# Supplementary material for: A greener approach for synthesizing metal-decorated carbogels from alginate for emerging technologies
Source: Royal Society of Chemistry journal article supplement (doi:10.1039/d3na00444a), 2023-01-01
Supplement: d3na00444a1.pdf [file d3na00444a1.pdf]

## **A greener approach to synthesizing metal-decorated carbogels from alginate for emerging technologies**

Juan I. del Río<sup>a,b</sup>, Laura Juhász<sup>c</sup>, József Kalmár<sup>d</sup>, Zoltán Erdélyi<sup>c</sup>, María D. Bermejo<sup>a</sup>, Ángel Martín<sup>a</sup>, Irina Smirnova<sup>e</sup>, Pavel Gurikov<sup>f,g</sup>, Baldur Schroeter<sup>e\*</sup>

<sup>a</sup> BioEcoUva, Bioeconomy Research Institute, PressTech Group, Department of Chemical Engineering and Environmental Technology, Universidad de Valladolid, Prado de La Magdalena S/n, 47011 Valladolid, Spain

<sup>b</sup> Grupo Procesos Químicos Industriales, Department of Chemical Engineering, Universidad de Antioquia UdeA, Calle 70 No. 52-21, Medellín 050010, Colombia

<sup>c</sup> Department of Solid State Physics, University of Debrecen, Egyetem sqr. 1, H-4032 Debrecen, Hungary

<sup>d</sup> ELKH-DE Mechanisms of Complex Homogeneous and Heterogeneous Chemical Reactions Research Group, Department of Inorganic and Analytical Chemistry, University of Debrecen, Egyetem tér 1., Debrecen, H-4032 Hungary

<sup>e</sup> Institute for Thermal Separation Processes, Hamburg University of Technology, Eißendorfer Straße 38, 21073 Hamburg, Germany

<sup>f</sup> Laboratory for Development and Modelling of Novel Nanoporous Materials, Hamburg University of Technology, Eißendorfer Straße 38, 21073 Hamburg, Germany

<sup>g</sup> aerogel-it GmbH, Albert-Einstein-Str. 1, 49076 Osnabrück, Germany

\*Corresponding author Tel.: +49 40 42878 3962

E-mail address: baldur.schroeter@tuhh.de

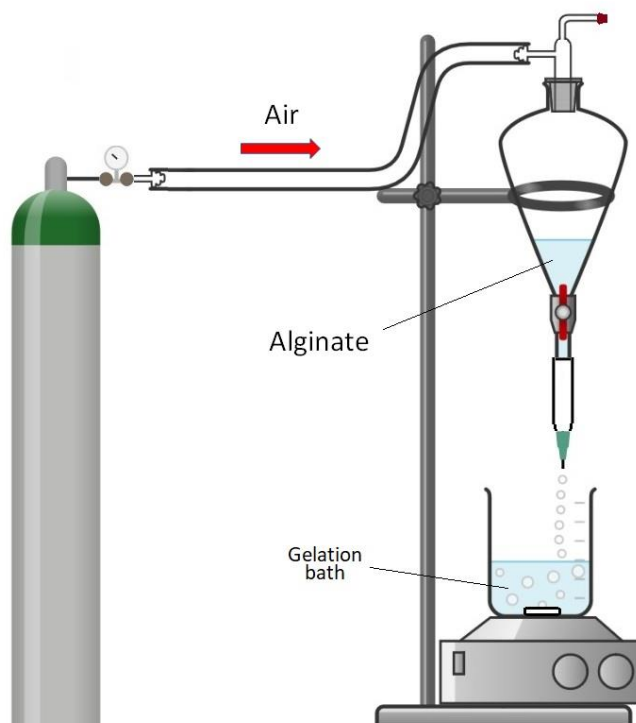

**Fig. S1** Dripping device for production of alginate hydrogel beads.

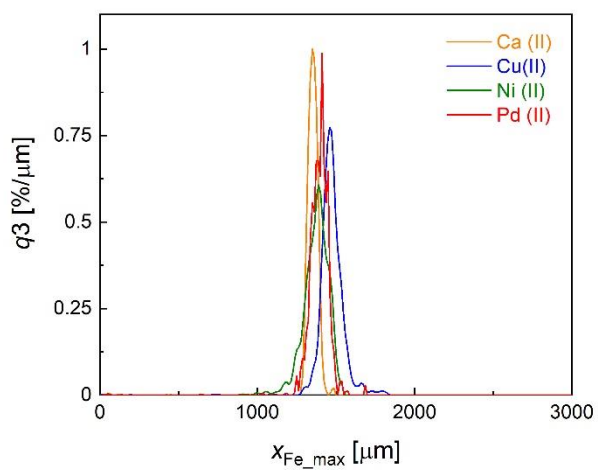

**Fig. S2** Particle size distributions of M-CAs produced with different metal ions at  $c_m = 17$  mmol/L.  $x_{Fe\_max}$  corresponds to the longest ferret-diameter (see [doi.org/10.1007/s10570-020-03555-2](https://doi.org/10.1007/s10570-020-03555-2)).

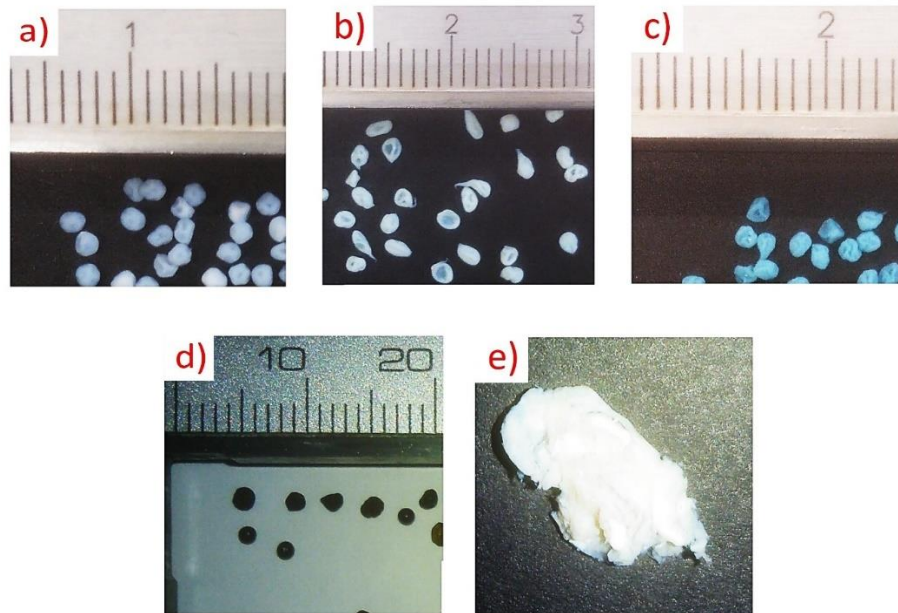

**Fig. S3** M-CAs beads produced via crosslinking of alginate with different ions: a) Ca(II), b) Ni(II), c) Cu(II), d) Pd(II) and e) Pt(IV) foam.

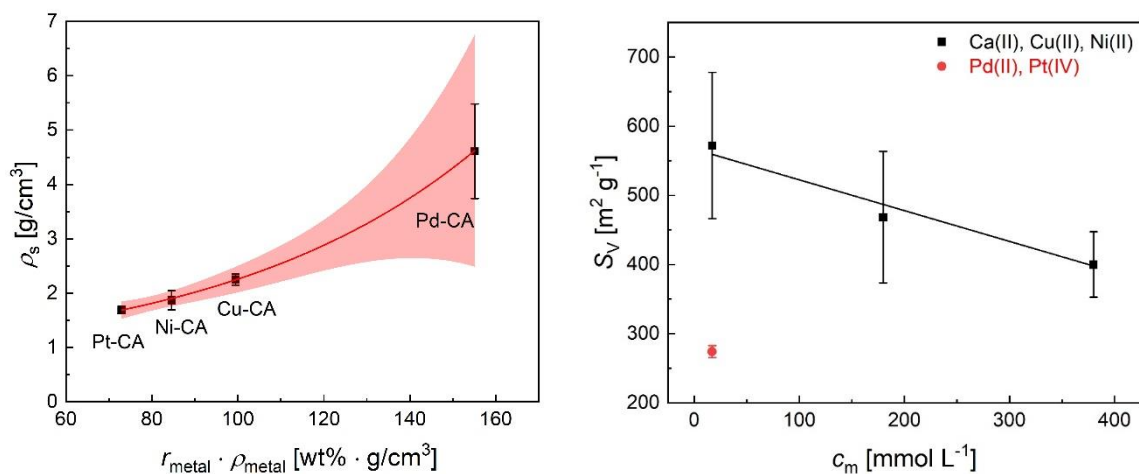

**Fig. S4** Left: Skeletal density of different M-CAs in dependence of  $r_{\text{metal}}$  and parent metals density (Ni = 58.69 g/cm<sup>3</sup>, Cu = 63.55 g/cm<sup>3</sup>, Pd = 106.40 g/cm<sup>3</sup>, Pt = 195.09 g/cm<sup>3</sup>). Error bars correspond to standard deviation of skeletal density measurements, line to exponential fitting ( $R^2$  0.998), highlighted area to the 95% confidence interval. Right: Specific surface area of M-CAs in dependence of metal salt concentration in the gelation bath. Values are averaged for different metal ions, error bars correspond to the standard deviation of the average.

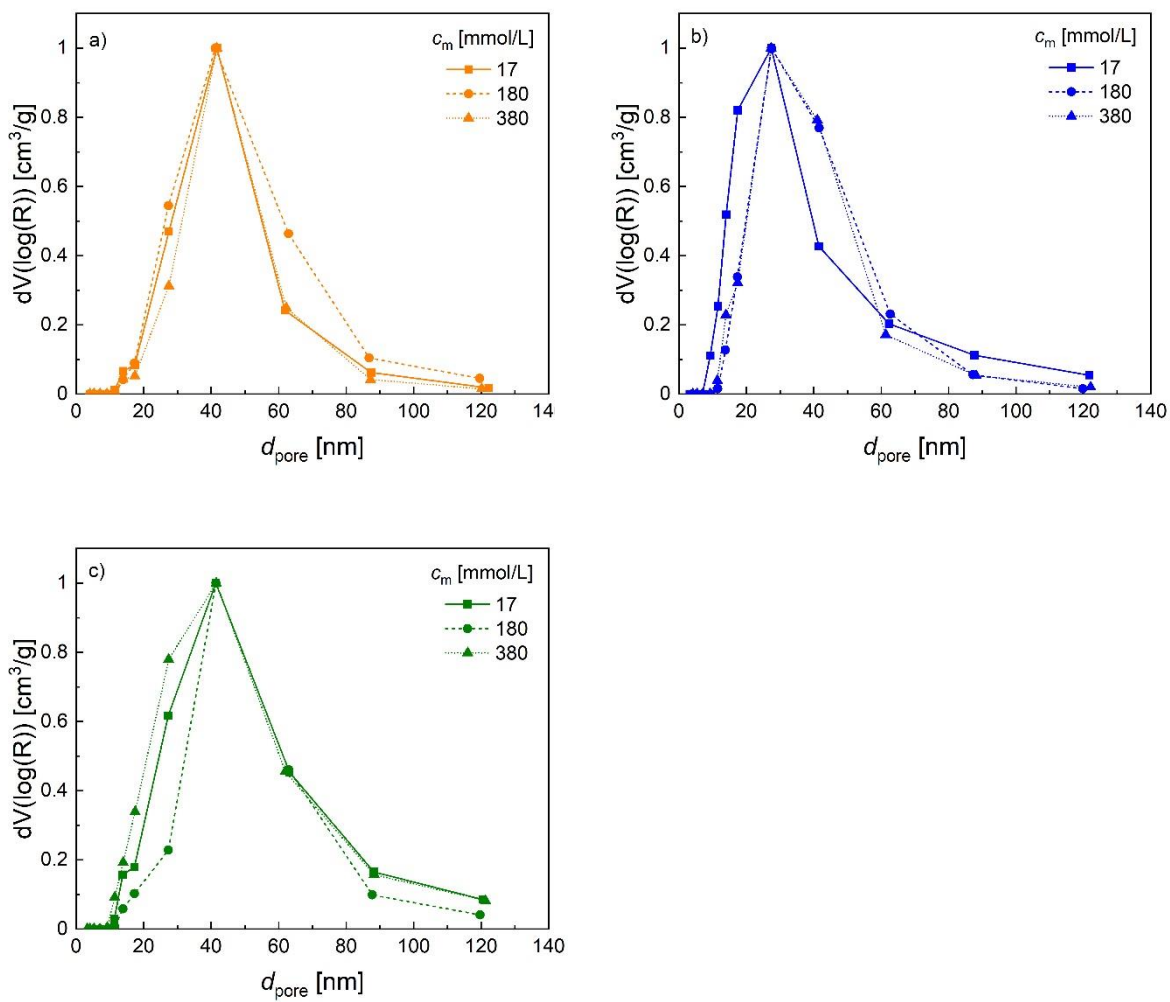

**Fig. S5** Pore size distributions of M-CAs crosslinked with Ca(II) (a), Cu(II) (b) and Ni(II) (c) ions at different metal salt concentrations in the gelation bath ( $c_m$ ). Lines are drawn to guide the eye.

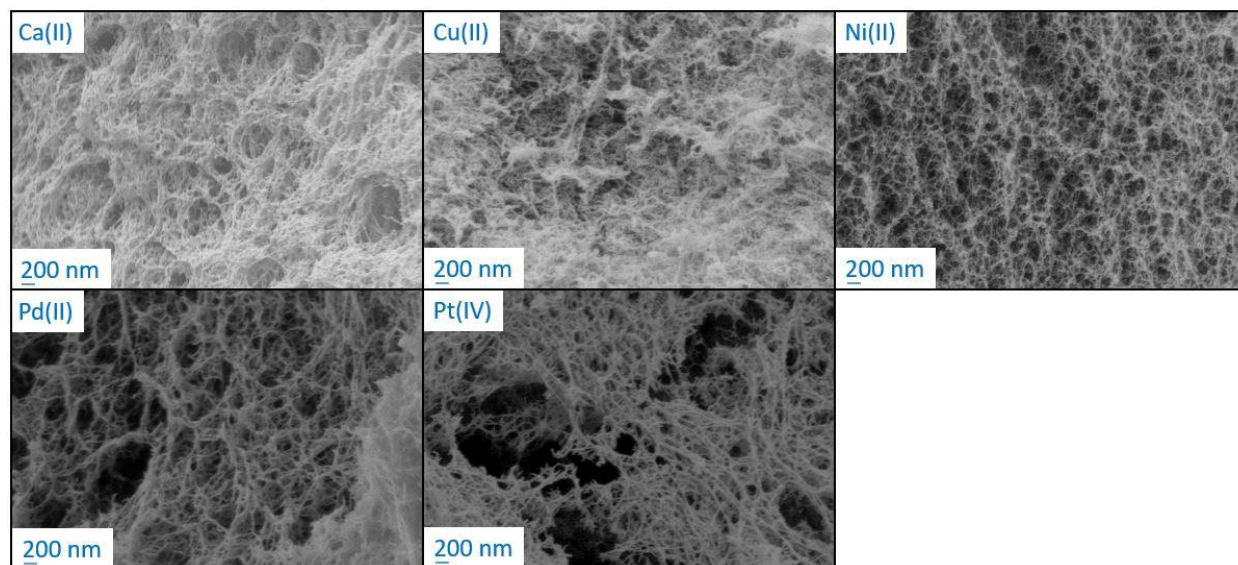

**Fig. S6** SEM pictures of inner pore structures of alginate aerogels crosslinked with different metal ions at  $c_m = 17 \text{ mmol L}^{-1}$ , magnification 50000 x.

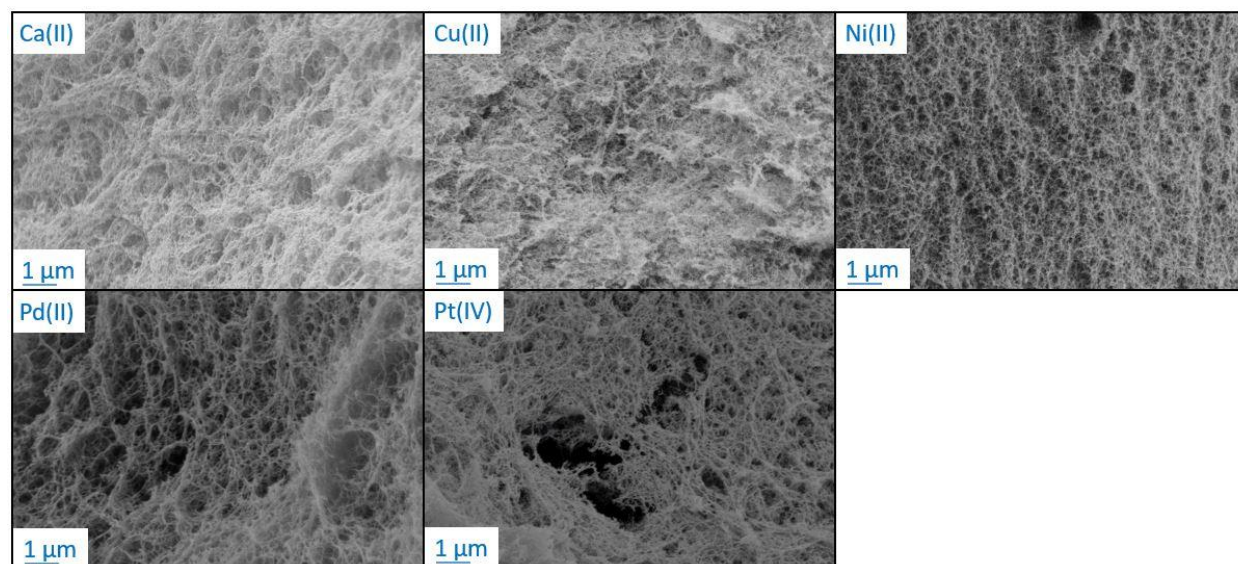

**Fig. S7** SEM pictures of inner pore structures of alginate aerogels crosslinked with different metal ions at  $c_m = 17 \text{ mmol L}^{-1}$ , magnification 25000 x.



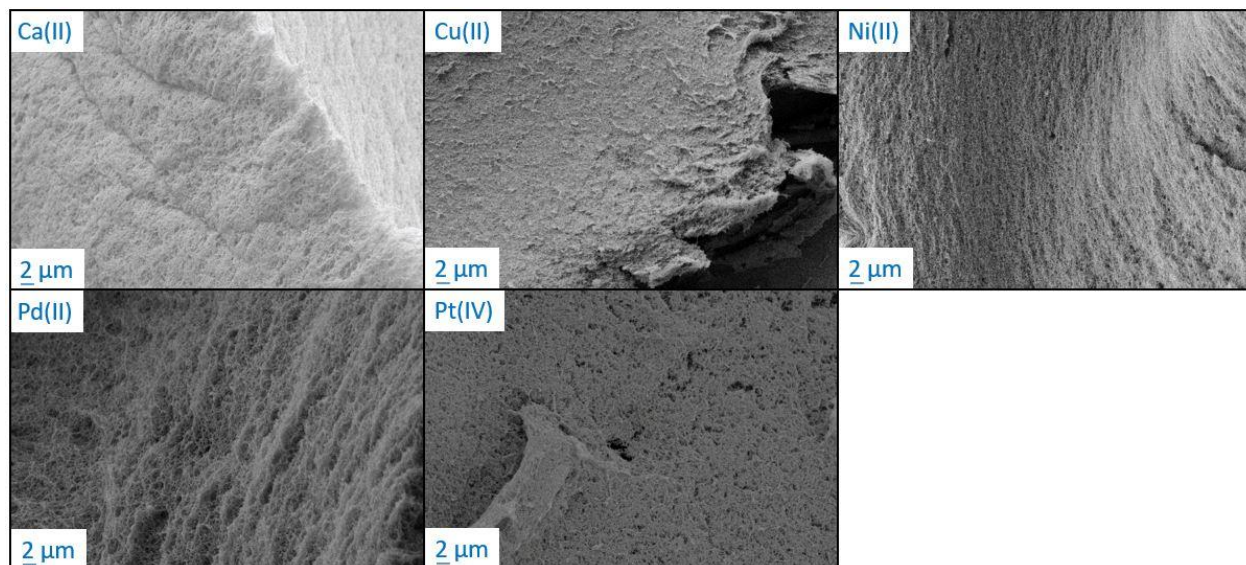

**Fig. S8** SEM pictures of inner pore structures of alginate aerogels crosslinked with different metal ions at  $c_m = 17 \text{ mmol L}^{-1}$ , magnification 5000 x.

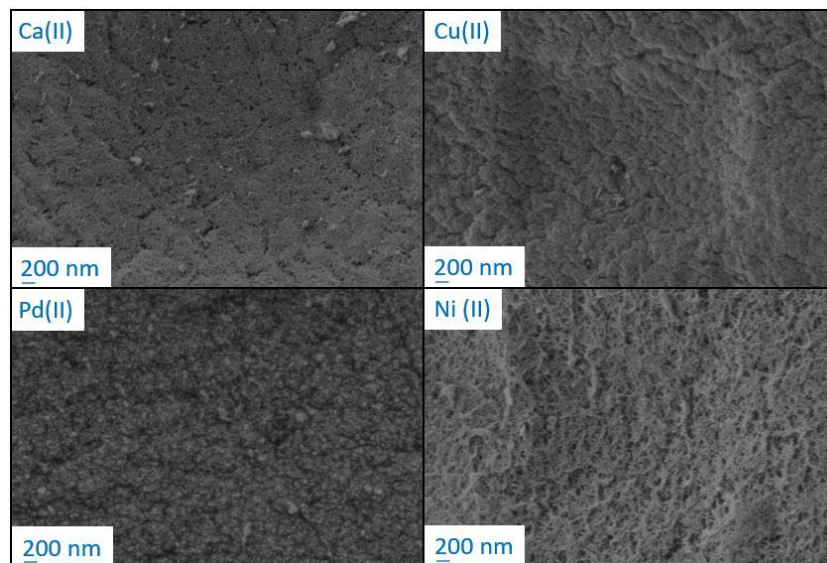

**Fig. S9** SEM pictures of outer skin of alginate aerogels crosslinked with different metal ions at  $c_m = 17 \text{ mmol L}^{-1}$ , magnification 50000 x.

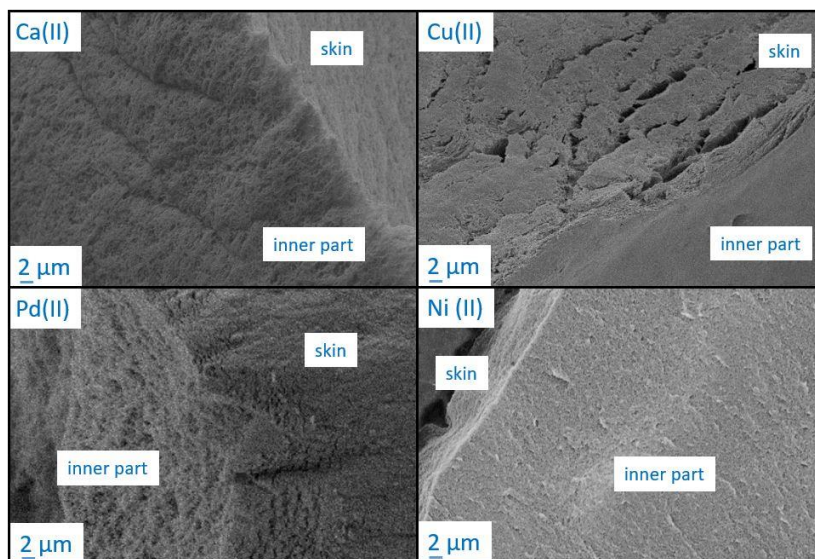

**Fig. S10** SEM pictures of outer skin and inner pores of alginate aerogels crosslinked with different metal ions at  $C_m = 17 \text{ mmol L}^{-1}$ , magnification 5000 x.

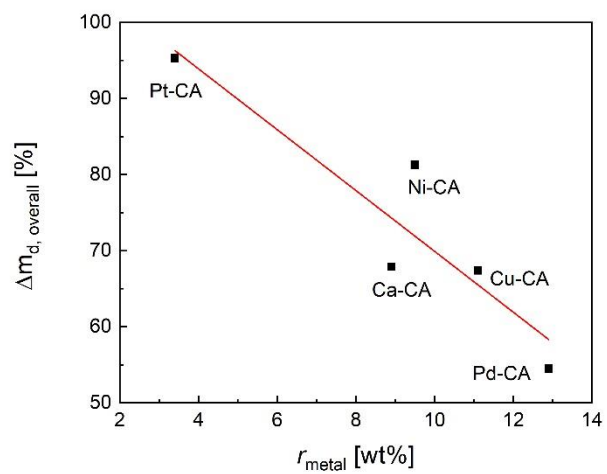

**Fig. S11** Overall mass loss of M-CAs caused by pyrolysis up to  $T_P = 600 \text{ }^\circ\text{C}$  in dependence of  $r_{\text{metal}}$ . The straight line corresponds to linear fitting.

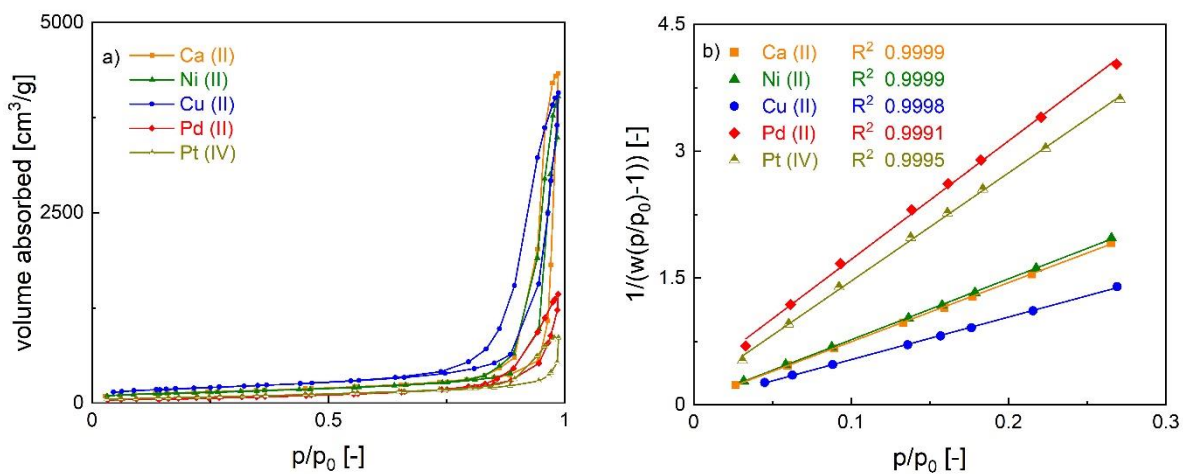

**Fig. S12** Nitrogen-adsorption-desorption isotherms of M-CAs crosslinked with different metal ions (a) and according BET-plots (b).

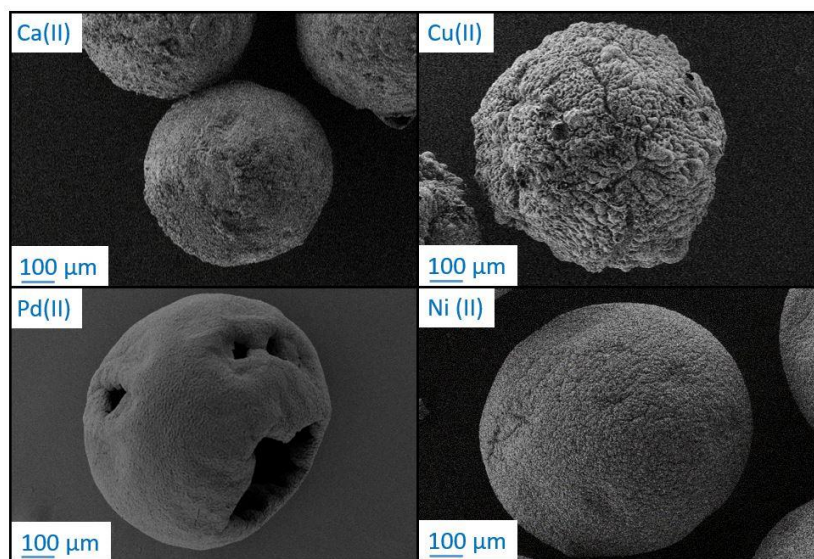

**Fig. S13** M-DC beads produced via crosslinking of alginate with different metal ions, followed by pyrolysis ( $T_P = 600\text{ }^\circ\text{C}$ ).
